# Supplementary material for: Limosilactobacillus reuteri Attenuates Atopic Dermatitis via Changes in Gut Bacteria and Indole Derivatives from Tryptophan Metabolism
Source: MDPI journal article supplement (doi:10.3390/ijms23147735), 2022-07-13
Supplement: s1 [file s1]

## Supplementary Material

### 1 Supplementary Figure

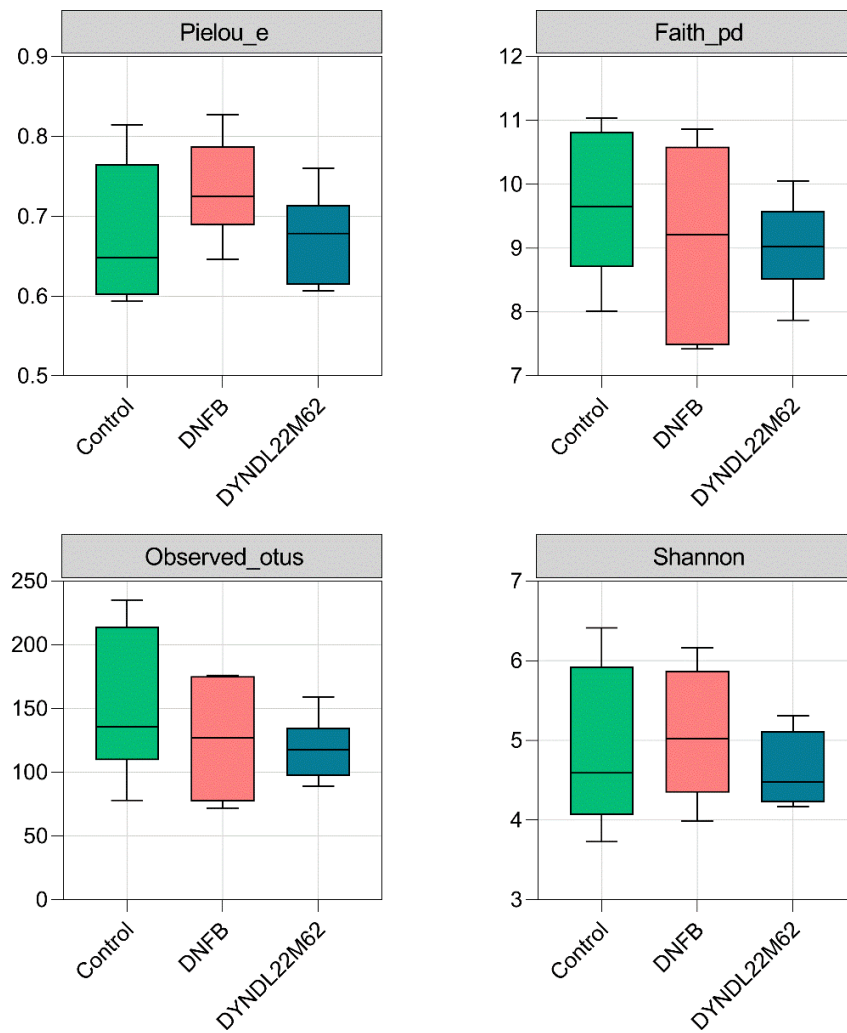

**Supplementary Figure S1.** Alpha diversity of gut microbiota between groups.
